# Supplementary material
Source: PubMed Central journal article supplement (PMC2728795)

**Supplementary Figure S1. Effect of (541-605)PRG-FKBP on actin polymerization.** Effect of recombinant monomeric or dimeric (541-605)PRG-FKBP or VCA+Arp2/3 on actin polymerization was examined using pyrene conjugated actin alone (□, blue) or with VCA+Arp2/3 (○, red), monomeric (541-605)PRG-FKBP (◇, green) or dimeric (541-605)PRG-FKBP (△, orange).

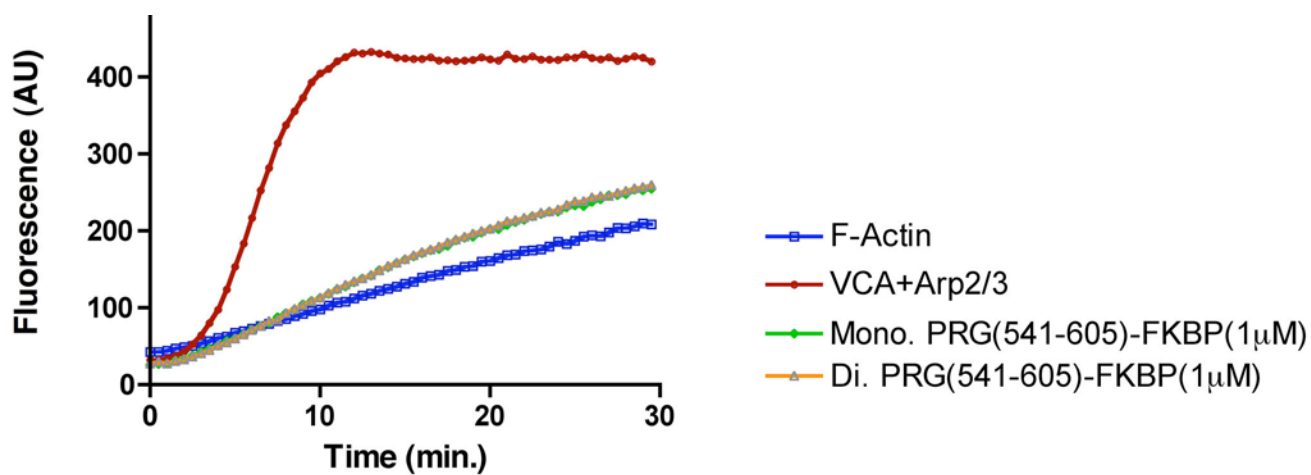

Supplement: NIHMS135253-supplement-1_si_001.pdf [file NIHMS135253-supplement-1_si_001.pdf]
